# Supplementary material for: Determination of the optical constants of ligand-free organic lead halide perovskite quantum dots
Source: Royal Society of Chemistry journal article supplement (doi:10.1039/d2nr05109e), 2022-11-05
Supplement: d2nr05109e1.pdf [file d2nr05109e1.pdf]

## Supporting Information

# Determination of Optical Constants of Ligand-free Organic Lead Halide Perovskite Quantum Dots

*Andrea Rubino, Gabriel Lozano, Mauricio E. Calvo, and Hernán Míguez*

### **Tauc plots. Bandgap energy estimation.**

In the case of direct bandgap semiconductors, the Tauc relation states that

$$(\alpha hv)^2 = C(hv - E_g), \quad (S1)$$

where  $\alpha$  is the absorption coefficient,  $h$  the Planck constant,  $\nu$  the frequency of the photon,  $C$  is a constant and  $E_g$  the energy of the band-band transition of the semiconductor.  $E_g$ 's extrapolation procedure consists of representing the quadratic dependence (in the case of direct bandgap semiconductors) of the absorption ( $\alpha hv$ ) with respect to the energy ( $h\nu$ ) and intercepting the energies axis with a tangent to the inversion point of the curve. The inversion should in fact correspond to the linear region between the energy range where the absorption is zero (above the band edge) and the region where the material absorbs. The Tauc procedure is an approximation used mainly for bulk materials and which in any case does not provide an exact value of the band gap, but as already mentioned, the estimate of the Tauc gap, in this context, is a useful parameter to use as first approximation in the determination of the optical constants.

### **Brus model for the determination of perovskite NCs size**

Brus approximation allows for the extrapolation of the radius ( $R$ ) of a semiconductor nanocrystal by means of the following equation:<sup>1</sup>

$$E_{g,NC} \simeq E_{g,bulk} + \frac{h^2}{8\mu R^2} - \frac{1.8 e^2}{4\pi\epsilon_0\epsilon_r R} \quad (S2)$$

The dependence on the radius of the excitonic energy of the nanoparticle  $E_{g,NC}$  is derived by adding two terms to the bandgap energy of the bulk material ( $E_{g,bulk}$ ). The first term represents the quantization of the energy of a spherical particle-in-a-box system with infinite potential on the walls.  $h$  is the Planck constant and  $\mu$  is the reduced mass of the exciton. The second term takes into consideration the electrostatic interaction between charges. In this term,  $e$  is the charge of the electron and  $\epsilon_0$  and  $\epsilon_r$  the dielectric constants of the vacuum and that of the bulk semiconductor, respectively. We used the Tauc gap as an approximation of the bandgap energy ( $E_g$ ) of the NCs together with 4.2 and 17 as values for the dielectric constants of MAPbBr<sub>3</sub> and MAPbI<sub>3</sub>, respectively, and  $0.45m_0$  and  $0.3m_0$  for their reduced masses.<sup>2,3</sup>

### Experimental quantification of the filling fraction of perovskite nanocrystals

In order to study the spectral and size dependence of the optical constants of perovskite nanocrystals, a more precise quantitative investigation on the volume of perovskites contained within the porous matrix was necessary. In order to do so, lead determination was carried out through atomic emission spectroscopy with an inductively coupled plasma (ICP OES JASCO FT / IR-6200 IRT-5000). Porous films loaded with perovskite NCs synthesized in series at decreasing concentrations (in order to attain different NC sizes) were immersed in water to degrade  $\text{CH}_3\text{PbX}_3$  perovskites to  $\text{PbX}_2$ , which solubilizes completely in the aqueous phase. Once the amount of lead element was obtained, it was possible to trace the mass of perovskite considering the weight proportion of the lead included in the perovskite composition. Then the volumetric ratio between silica and perovskite, was calculated taking into account the areas of the immersed samples, the thicknesses measured with a profilometer and density values reported in the literature for  $\text{MAPbBr}_3$  and  $\text{MAPbI}_3$ :  $3.83 \text{ gr/cm}^3$  and  $4.15 \text{ gr/cm}^3$ , respectively<sup>4,5</sup> Results are summarized in table S1. As a counter-test of the analysis, we performed a similar estimation on the amount of lead in bulk samples. The resulting volume for the thin film material corresponds to the volume obtained from direct measurements of area and thickness of the sample.

| $\text{MAPbI}_3$  | Pb<br>ppm | $\text{MAPbI}_3$ mass<br>mg  | $\text{MAPbI}_3$ Volume<br>$\text{mm}^3$  | Total film Volume<br>$\text{mm}^3$ | $\text{MAPbI}_3$<br>v/v %  |
|-------------------|-----------|------------------------------|-------------------------------------------|------------------------------------|----------------------------|
| bulk              | 13.10     | 0.392                        | 0.0945                                    | 0.091125                           | $\approx 100$              |
| 9 nm              | 11.11     | 0.332                        | 0.08                                      | 0.1932                             | 41.4 in $\text{SiO}_2$     |
| 7 nm              | 7.08      | 0.212                        | 0.0511                                    | 0.1978                             | 25.8 in $\text{SiO}_2$     |
| 6 nm              | 2.87      | 0.086                        | 0.0207                                    | 0.2024                             | 10.2 in $\text{SiO}_2$     |
| $\text{MAPbBr}_3$ | Pb<br>ppm | $\text{MAPbBr}_3$ mass<br>mg | $\text{MAPbBr}_3$ Volume<br>$\text{mm}^3$ | Total film Volume<br>$\text{mm}^3$ | $\text{MAPbBr}_3$<br>v/v % |
| Bulk              | 31.29     | 0.723                        | 0.1887                                    | 0.1518                             | $\approx 100$              |
| 2.40 nm           | 2.15      | 0.050                        | 0.0131                                    | 0.2592                             | 5.05 in $\text{SiO}_2$     |
| 2.30 nm           | 0.785     | 0.018                        | 0.0047                                    | 0.2277                             | 2.06 in $\text{SiO}_2$     |
| 2.20 nm           | 0.29      | 0.007                        | 0.0018                                    | 0.23805                            | 0.76 in $\text{SiO}_2$     |

**Table S1.** Quantitative analysis of iodide- and bromide-based perovskite inside the  $\text{SiO}_2$  matrix from samples prepared with different precursor concentration. Columns from the left to the right correspond to the sample, Pb content from ICP, calculated perovskite mass and volume, total volume measured for the bulk film and  $\text{SiO}_2$  matrix (considering that perovskite

is formed only inside the pores) and percentage of perovskite volume with respect the total volume of the composite system.

### **Modeling the Complex refractive index of perovskite NCs. Fitting parameters.**

In order to obtain the spectral dependence of the complex refractive index of the perovskite nanocrystals ( $N_{NC}$ ) synthesized in the porous matrices, we use a model that combines the transfer matrix method with a genetic algorithm to calculate the specular reflectance ( $R_{the}$ ) and ballistic transmittance ( $T_{the}$ ) of the films by fitting their experimental specular reflectance ( $R_{exp}$ ) and ballistic transmittance ( $T_{exp}$ ) with the least squares method. In particular, we find the set of parameters that fit the response of the films in the wavelength range comprised between  $\lambda=400$  nm and  $\lambda =1000$  nm for three different angles of incidence, i.e.  $\theta=0$  deg, 30 deg and 50 deg. Thus, we define the following Target

$$Target = \sum_{i,j} (R_{exp}(\theta_i, \lambda_j) - R_{the}(\theta_i, \lambda_j))^2 + (T_{exp}(\theta_i, \lambda_j) - T_{the}(\theta_i, \lambda_j))^2$$

To calculate the theoretical response, our model considers a layered system composed by a thin film (porous silica matrix loaded with NCs with a complex refractive index  $N_{eff}$  and thickness  $d$ ) and a substrate (refractive index 1.51 and thickness 1 mm). Air (refractive index 1) is taken as incoming and outgoing media for light. We calculate the real ( $n_{eff}$ ) and imaginary ( $k_{eff}$ ) parts of  $N_{eff}$  of the porous silica film loaded with perovskite NCs using an effective medium approach ( $f_{EMA}$ ) according to

$$N_{eff}(E) = f_{EMA}(N_{sil}, f_{sil}, N_{NC}, f_{NC})$$

where  $N_{sil}$  and  $N_{NC}$  are the complex refractive indices of the silica matrix, which is considered only real and dispersionless as 1.4867, and the perovskite NCs, respectively; and  $f_{sil}$ , which is found to be 0.51, and  $f_{NC}$  are their volume fractions in the composite film. The spectral dependence of  $N_{NC}$  is given by the Forouhi-Bloomer model in the parameterization of Jobin Yvon (new amorphous) as:

$$n_{NC}(E) = n_{\infty} + \sum_{j=1}^N \frac{B_j(E - E_j) + C_j}{(E - E_j)^2 + \Gamma_j^2}$$

$$k_{NC}(E) = \begin{cases} \sum_{j=1}^N \frac{a_j(E - E_j)^2}{(E - E_j)^2 + \Gamma_j^2}; & \text{for } E > E_g \\ 0; & \text{for } E < E_g \end{cases}$$

with

$$B_j = \frac{a_j}{\Gamma_j} (\Gamma_j^2 - (E - E_j)^2)$$

$$C_j = 2a_j\Gamma_j(E - E_j)$$

Where  $n_{\infty}$  is the refractive index in the high-energy limit,  $E$  is the energy of the light,  $E_g$  is the bandgap, and  $E_j$ ,  $a_j$ , and  $\Gamma_j$  are, respectively, the spectral position, strength, and width of each of the oscillators employed to model the complex refractive index of the semiconductor.

| MAPbI <sub>3</sub> | ff <sub>pvk</sub> | d (nm) | E <sub>g</sub> (eV) | n <sub>∞</sub> | E <sub>1</sub> | a <sub>1</sub> | Γ <sub>1</sub> | E <sub>2</sub> | a <sub>2</sub> | Γ <sub>2</sub> | E <sub>3</sub> | a <sub>3</sub> | Γ <sub>3</sub> |
|--------------------|-------------------|--------|---------------------|----------------|----------------|----------------|----------------|----------------|----------------|----------------|----------------|----------------|----------------|
| bulk               |                   | 200    | 1.55                | 1.800          | 1.58           | 0.127          | 0.082          | 2.29           | 0.028          | 0.357          | 3.20           | 0.003          | 1              |
| 9 nm               | 0.41              | 398    | 1.58                | 1.796          | 1.59           | 0.210          | 0.102          | 2.46           | 0.024          | 0.265          | 3.30           | 0.028          | 0.988          |
| 7 nm               | 0.26              | 401    | 1.59                | 1.748          | 1.60           | 0.305          | 0.250          | 2.52           | 0.214          | 0.658          | 3.30           | 0.011          | 0.96           |
| 6 nm               | 0.10              | 405    | 1.63                | 1.800          | 1.59           | 0.500          | 0.232          | 2.47           | 0.190          | 0.508          | 3.22           | 0.057          | 0.743          |

| MAPbBr <sub>3</sub> | ff <sub>pvk</sub> | d (nm) | E <sub>g</sub> (eV) | n <sub>∞</sub> | E <sub>1</sub> | a <sub>1</sub> | Γ <sub>1</sub> | E <sub>2</sub> | a <sub>2</sub> | Γ <sub>2</sub> |
|---------------------|-------------------|--------|---------------------|----------------|----------------|----------------|----------------|----------------|----------------|----------------|
| Bulk                |                   | 320    | 2.25                | 1.746          | 2.32           | 0.086          | 0.064          | 2.66           | 0.034          | 0.419          |
| 2.40 nm             | 0.05              | 433    | 2.28                | 1.807          | 2.34           | 0.313          | 0.077          | 2.65           | 0.567          | 0.692          |
| 2.30 nm             | 0.02              | 430    | 2.30                | 1.721          | 2.34           | 0.600          | 0.056          | 2.73           | 0.905          | 0.553          |
| 2.20 nm             | 0.01              | 460    | 2.32                | 1.722          | 2.33           | 0.891          | 0.074          | 2.77           | 0.808          | 0.490          |

**Table S2.** Fitting parameters attained for MAPbX<sub>3</sub> NCs assuming a Maxwell-Garnet EMA to account for the interaction between the NCs and the porous silica matrix.

### Dielectric function of perovskite nanocrystals

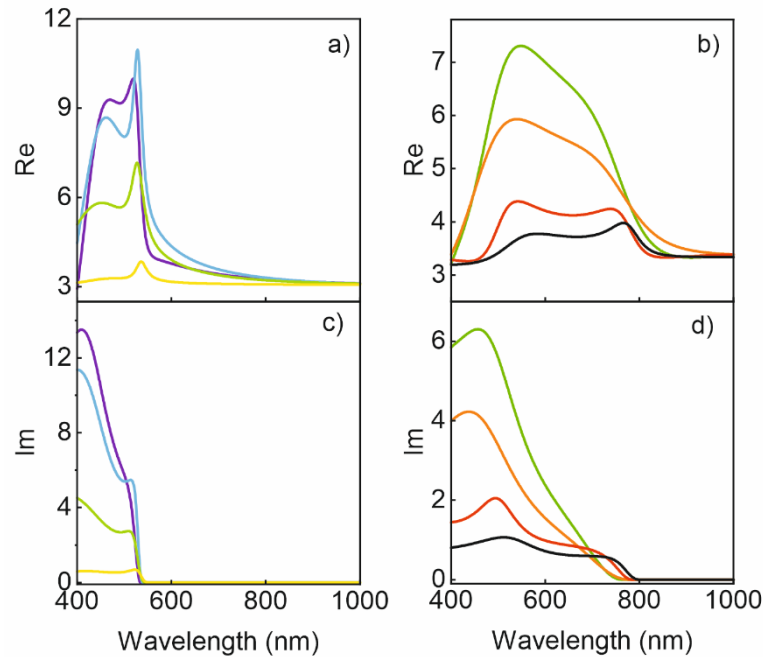

**Figure S1.** Real (a, b) and imaginary (c, d) parts of the dielectric function obtained for MAPbBr<sub>3</sub> NCs and polycrystalline film (a, c) and MAPbI<sub>3</sub> NCs and polycrystalline film (b, d). The same colour legend as in figure 4 is used.

## Comparing effective medium approximation models

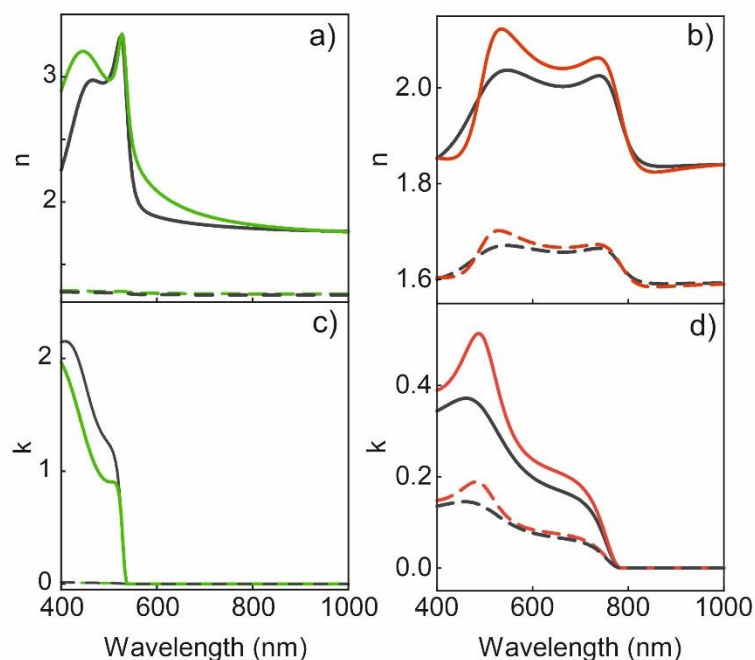

**Figure S2.** Comparative analysis of the real part of the complex refractive index (a, b) and extinction coefficient (c,d) calculated for MAPbBr<sub>3</sub>-based samples (panels a and c) and MAPbI<sub>3</sub>-based samples (panels b and d) with different effective medium approximation models. Color legend: Maxwell-Garnett (green and red lines in all panels); Maxwell-Garnett considering an effective index matrix (i.e, not assuming the pores as inclusions, but just the perovskite QDs; black lines in a and c for MAPbBr<sub>3</sub>); Bruggeman (black lines in b and d for MAPbI<sub>3</sub>). Solid lines correspond to MAPbBr<sub>3</sub> NCs (2.3 nm) and MAPbI<sub>3</sub> NCs (9 nm), dashed lines correspond to the effective complex refractive index of perovskite@silica layer containing that same perovskites NCs.

### References

<sup>(1)</sup> Brus, L. E. *J. Chem. Phys.* **1984**, 80, 4403-4409.

<sup>(2)</sup> David O. Tiede, Andrea Rubino, Mauricio E. Calvo, Juan F. Galisteo-López and Hernan Míguez *J. Phys. Chem. C*, **2020**, 124, 14, 8041-8046

<sup>(3)</sup> A. Rubino, A. Francisco-López, A. J. Barker, A. Petrozza, M. E. Calvo, A. R. Goñi, H. Míguez, *J. Phys. Chem. Lett.* **2021**, 12, 1, 569–575.

<sup>(4)</sup> M. R. Leyden, L. Meng, Y. Jiang, L. K. Ono, L. Qiu, E. J. Juarez-Perez, C. Qin, C. Adachi, Y. Qi, *J. Phys. Chem. Lett.* **2017**, 8, 3193-3198.

<sup>(5)</sup> C.C. Stoumpos, C.D. Malliakas, M. G. Kanatzidis, *Inorg. Chem.* **2013**, 52, 9019-9038.
